# Supplementary material for: Strong anchoring effect of ferric chloride-graphite intercalation compounds (FeCl3-GICs) with tailored epoxy groups for high-capacity and stable lithium storage
Source: Royal Society of Chemistry journal article supplement (doi:10.1039/c8ta06670a), 2018-01-01
Supplement: c8ta06670a1.pdf [file c8ta06670a1.pdf]

**Supporting Information**

**Strong Anchoring Effect of Ferric Chloride-Graphite Intercalation  
Compounds (FeCl<sub>3</sub>-GICs) with Tailored Epoxy Groups for High-  
Capacity and Stable Lithium Storage**

Chengzhi Zhang,<sup>a,b</sup> Jianmin Ma,<sup>c</sup> Fei Han,<sup>\*a,b</sup> Hongbo Liu,<sup>a,b</sup> Fuquan Zhang,<sup>a,b</sup>  
Changling Fan,<sup>a,b</sup> Jinshui Liu,<sup>\*a,b</sup> and Xuanke Li<sup>\*a,b,c</sup>

*<sup>a</sup> College of Materials Science and Engineering, Hunan University, Changsha 410082,  
China*

*<sup>b</sup> Hunan Province Key Laboratory for Advanced Carbon Materials and Applied  
Technology, Hunan University, Changsha, Hunan, 410082, China*

*<sup>c</sup> School of Physics and Electronics, Hunan University, Changsha 410082, China*

|                                                                                   | <b>G</b>                                                                                        | <b>OG (hydroxyl)</b>                                                                           | <b>OG2</b>                                                                                                 |                                                                                            |
|-----------------------------------------------------------------------------------|-------------------------------------------------------------------------------------------------|------------------------------------------------------------------------------------------------|------------------------------------------------------------------------------------------------------------|--------------------------------------------------------------------------------------------|
| 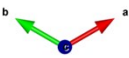 | <b>a</b><br>   | <b>b</b><br>  | <b>c</b><br>             | <b>Top view</b>                                                                            |
|                                                                                   | <b>FeCl<sub>3</sub>/G</b>                                                                       | <b>FeCl<sub>3</sub>/OG (hydroxyl)</b>                                                          | <b>FeCl<sub>3</sub>/OG2</b>                                                                                |  O atom |
|  | <b>d</b><br>   | <b>e</b><br>  | <b>f</b><br>             | <b>Top view</b>                                                                            |
|  | <br>Adsorption | <br>Repulsion | <br>Adsorption           | <b>Side view</b>                                                                           |
| <b>Binding energy</b>                                                             | $E_b=0.05875\text{eV}$                                                                          | $E_b=-0.88125\text{eV}$                                                                        | $E_b=0.21625\text{eV}$  |  H atom |

**Figure S1.** The building blocks of (a) pristine graphite (G), and oxidized graphite (OG) with (b) fully oxidized by hydroxyl groups, and (c) fully oxidized by epoxy groups (OG2). (d–f) Top view and side view of the FeCl<sub>3</sub>/G, FeCl<sub>3</sub>/OG (hydroxyl) and FeCl<sub>3</sub>/OG2 structures.

|                                                                                   | G                                                                                          | OG1                                                                                        | OG2                                                                                         |                                                                                             |
|-----------------------------------------------------------------------------------|--------------------------------------------------------------------------------------------|--------------------------------------------------------------------------------------------|---------------------------------------------------------------------------------------------|---------------------------------------------------------------------------------------------|
| 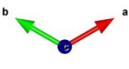 | <b>a</b>  | <b>b</b>  | <b>c</b>  | <b>Top view</b>                                                                             |
|                                                                                   | <b>LiCl/G</b>                                                                              | <b>LiCl/OG1</b>                                                                            | <b>LiCl/OG2</b>                                                                             |  O atom  |
|  | <b>d</b>  | <b>e</b>  | <b>f</b>  | <b>Top view</b>                                                                             |
|  |           |           |           | <b>Side view</b>                                                                            |
| <b>Binding energy</b>                                                             | $E_b = -0.18443\text{eV}$                                                                  | $E_b = 0.11248\text{eV}$                                                                   | $E_b = 0.30667\text{eV}$                                                                    |  Li atom |

**Figure S2.** The building blocks of (a) Graphite layer (G), and OG with (b) low content of epoxy functional groups (OG1), and (c) fully oxidized by epoxy groups (OG2). (d–f) top view and side view of the LiCl/G, LiCl/OG1 and LiCl/OG2 structures.

The adsorption energy per LiCl unit ( $E_b$ ) for the thermodynamic stability of a graphite monolayer with the monolayer LiCl to make LiCl/(O)G composite, is defined as:

$$E_b = (E_{\text{LiCl}} + E_{(\text{O})\text{G}} - E_{\text{LiCl}/(\text{O})\text{G}}) / n$$

where  $E_{\text{LiCl}}$ ,  $E_{(\text{O})\text{G}}$  and  $E_{\text{LiCl}/(\text{O})\text{G}}$  represent the total relaxation energies of monolayer LiCl, (O)G and LiCl/(O)G composite, respectively.  $n$  is the total number of LiCl unit in the supercell. The result shows that the interaction binding energies between LiCl and graphite monolayer increase with the increase of the content of the epoxy groups.

Therefore, the epoxy groups on the graphite layer are in favor of chemically anchoring LiCl, further preventing the dissolution of chlorides in electrolytes during electrochemical cycling.

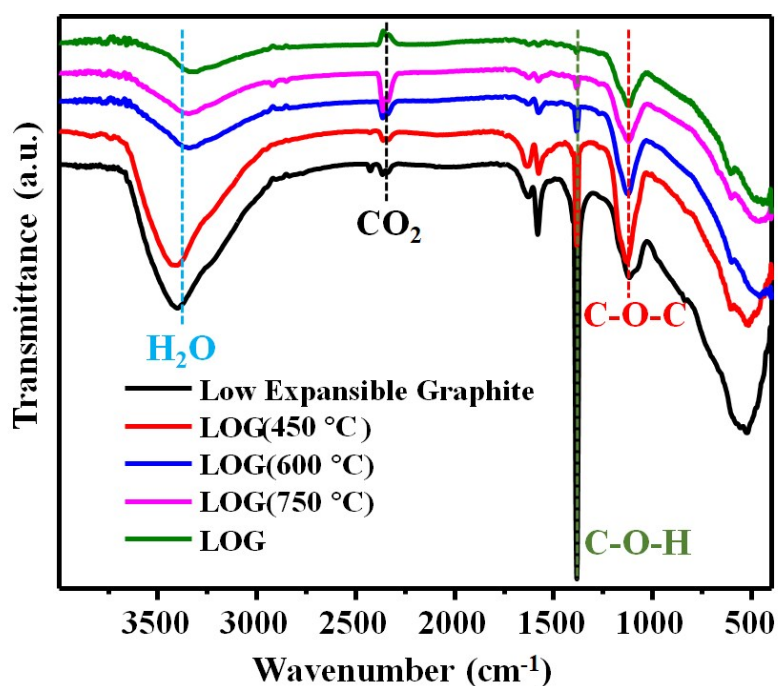

**Figure S3.** FT-IR spectra of low oxidized graphite and LOGs with different heat-treated temperatures of 450 °C, 600 °C, 750 °C and 900 °C at air for 12 sec, respectively.

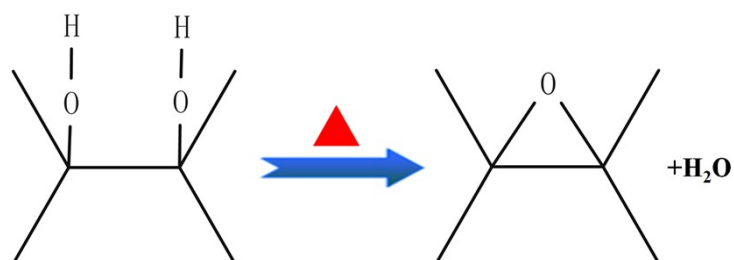

**Figure S4.** The conversion reaction between epoxy and hydroxyl on a graphite monolayer.<sup>1</sup>

To controllably produce epoxy groups on the graphite layers, previous works discovered that the hydroxyl groups formed during an oxidization process can be gradually transformed into the epoxy groups at a high temperature owing to the higher thermostability of the epoxy groups. A similar result in this work also prove the above viewpoint on the basis of the FT-IR spectra of low oxidized graphite and its derivatives (LOGs) heated at different temperatures from 450 to 900 °C (Figure S3 and S4). The result shows that the epoxy group is the main component of oxygen groups after a heating treatment at 900 °C.

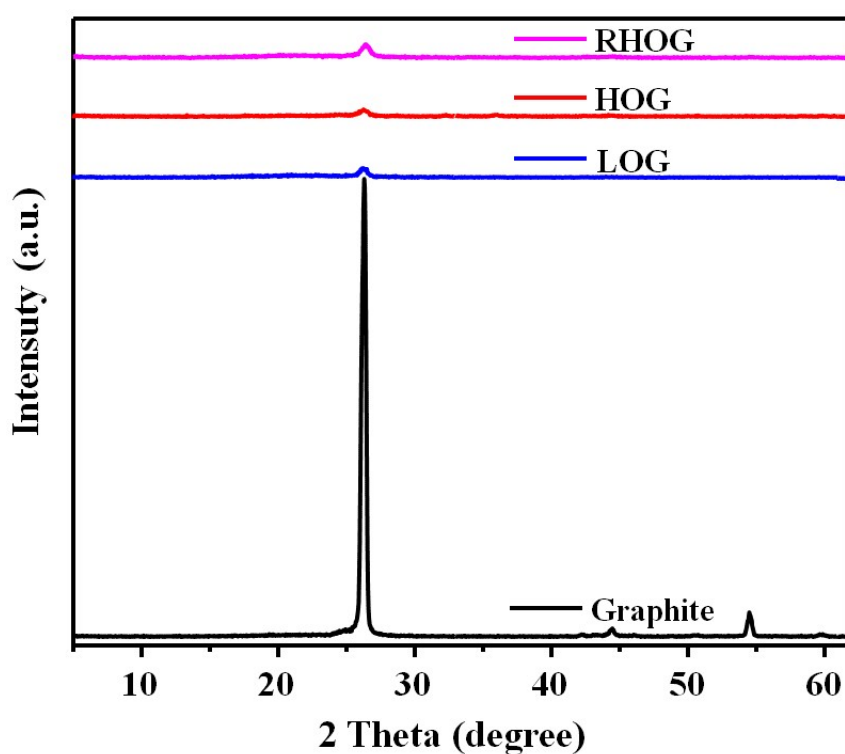

**Figure S5.** Wide-angle XRD patterns of pristine graphite, LOG, HOG and RHOG hosts.

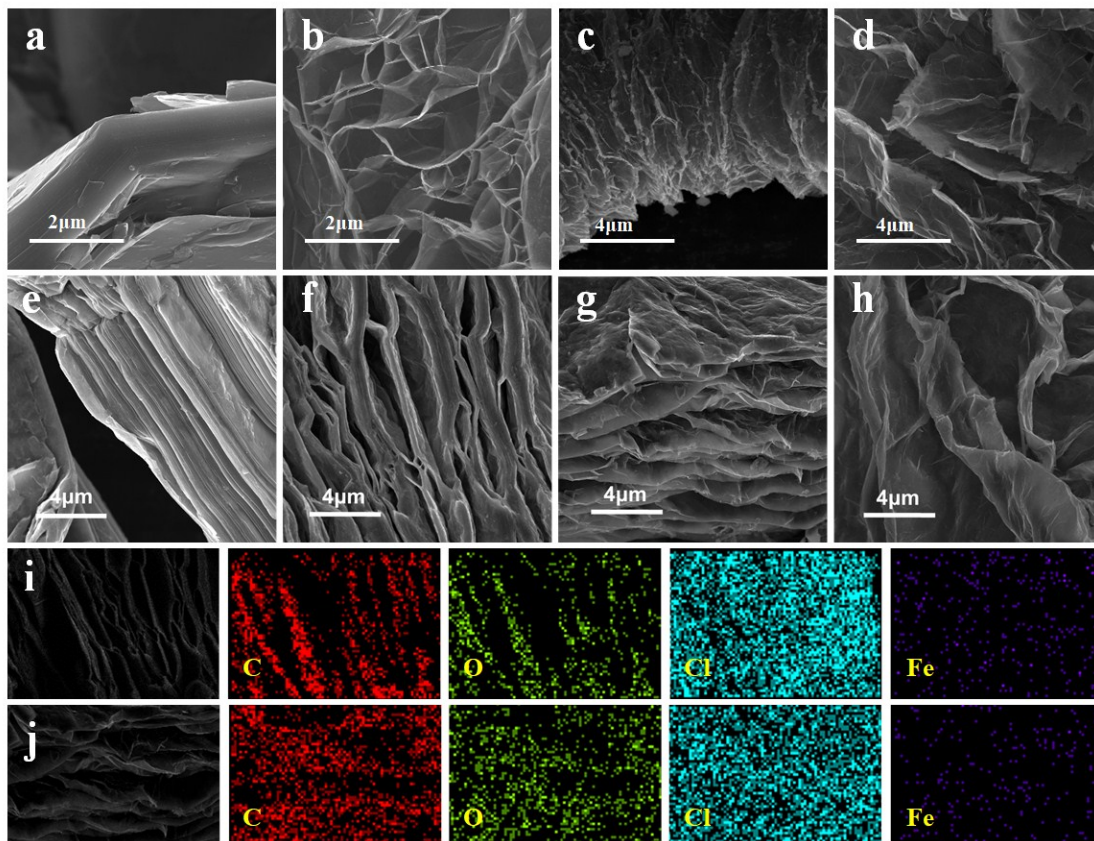

**Figure S6.** SEM images of (a,e) pristine graphite and its FeCl<sub>3</sub>-GIC, (b,f) LOG and its FeCl<sub>3</sub>-LOGIC, (c,g) HOG and its FeCl<sub>3</sub>-HOGIC, (d,h) RHOG and its FeCl<sub>3</sub>-RHOGIC. (i,j) The corresponding elemental mappings of (i) FeCl<sub>3</sub>-LOGIC and (j) FeCl<sub>3</sub>-HOGIC.



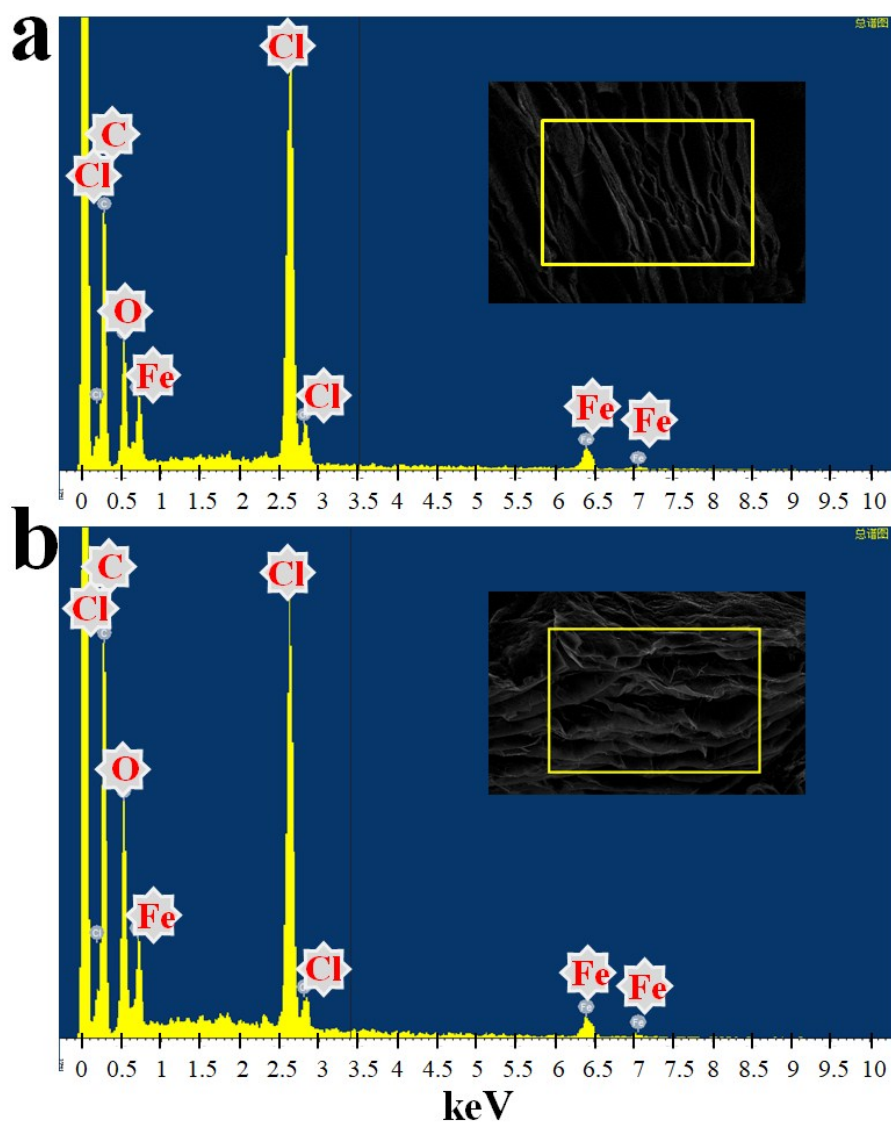

**Figure S7.** EDS of (a)FeCl<sub>3</sub>-LOGIC and (b)FeCl<sub>3</sub>-HOGIC.

Oxygen atomic percentages of FeCl<sub>3</sub>-LOGIC and FeCl<sub>3</sub>-HOGIC are 11.4%, 15.1%, respectively.

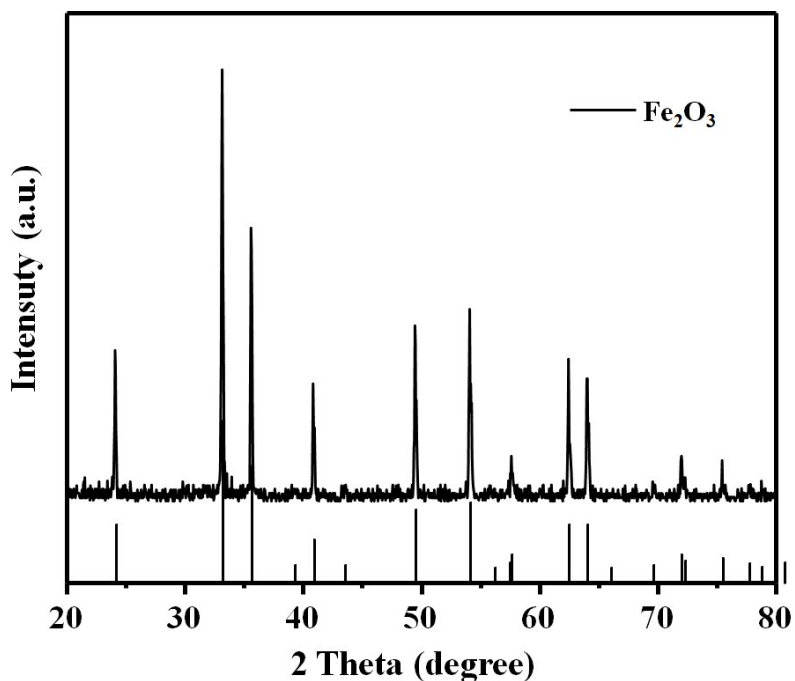

**Figure S8.** XRD pattern of the thermal analysis product in air.

**Table S1.** The FeCl<sub>3</sub> contents in pristine graphite (G) and various FeCl<sub>3</sub>-based GICs.

| Sample                     | G     | FeCl <sub>3</sub> -GIC | FeCl <sub>3</sub> -LOGIC | FeCl <sub>3</sub> -HOGIC | FeCl <sub>3</sub> -RHOGIC |
|----------------------------|-------|------------------------|--------------------------|--------------------------|---------------------------|
| FeCl <sub>3</sub> contents | 0.00% | 60.7%                  | 58.1%                    | 51.8%                    | 46.1%                     |

The FeCl<sub>3</sub> contents were measured by thermal analysis in air. The various GICs and graphite were heated at 900 °C for 2 h in a muffle furnace. The final product can be indexed to Fe<sub>2</sub>O<sub>3</sub> after heating from the XRD result (Figure S8).<sup>2</sup> Based on the change in weight and conversion ratio, the contents of FeCl<sub>3</sub> in different GICs are estimated and results are shown in Table S1.



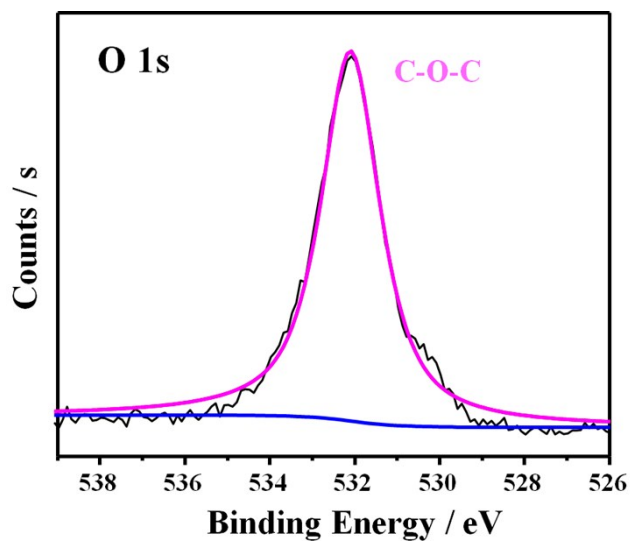

**Figure S9.** XPS profiles of the high-resolution spectra of O 1s of the FeCl<sub>3</sub>-HOGIC.

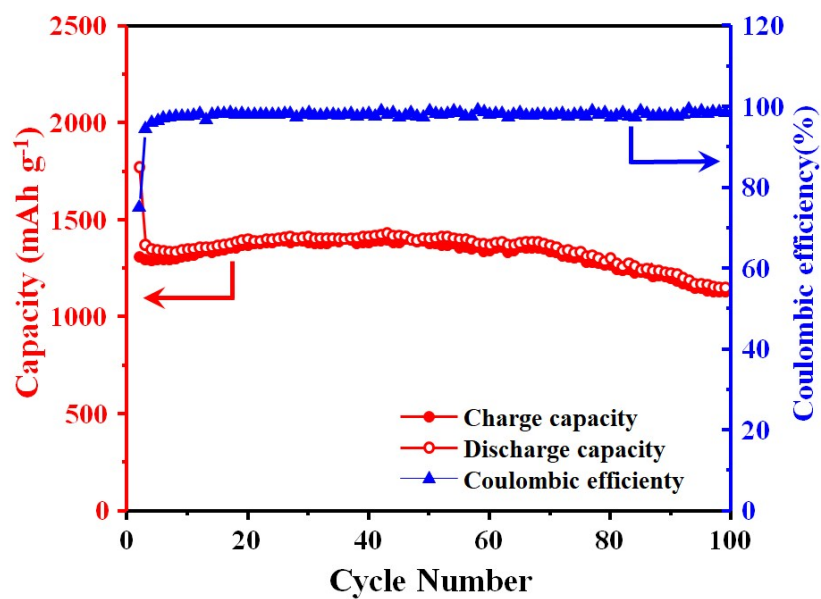

**Figure S10.** Long cycle performance of FeCl<sub>3</sub>-HOGIC with 100 cycles.

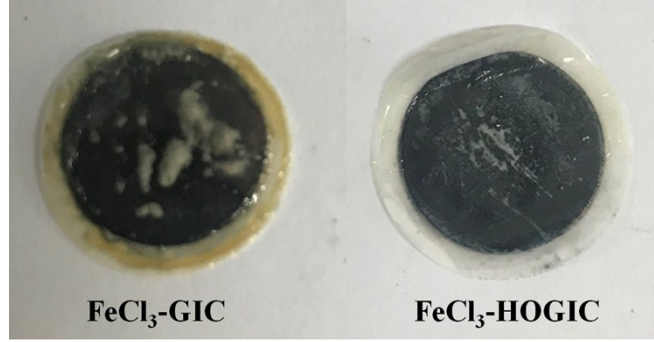

**Figure S11.** The photo of separator for LIBs after 50 cycles: (a) FeCl<sub>3</sub>-GIC and (b) FeCl<sub>3</sub>-HOGIC at a current density of 200 mA g<sup>-1</sup>. The yellow color of separator from FeCl<sub>3</sub>-GIC electrode undoubtedly comes from the dissolution of yellow FeCl<sub>3</sub> matter.

#### Calculation of the volume variation ratio in FeCl<sub>3</sub>-HOGIC anode

To accurately calculate the volume variation ratio of FeCl<sub>3</sub>-HOGIC after full lithiation, it is divided into two components: FeCl<sub>3</sub> and graphite. Their parameters are shown in the following table:

| Component         | $\rho$ , Density<br>(g cm <sup>-3</sup> ) | $\omega$ , Weight ratio | $\Delta V$ , Volume<br>variation ratio |
|-------------------|-------------------------------------------|-------------------------|----------------------------------------|
| FeCl <sub>3</sub> | 2.90                                      | 51.8%                   | 22.6%                                  |
| graphite          | 2.25                                      | 48.2%                   | 10.5%                                  |

Considering the total mass of FeCl<sub>3</sub>-HOGIC is  $m$ , The volume variation ratio of FeCl<sub>3</sub>-HOGIC can be calculated using the following equation:

$$\Delta V = \frac{(m\omega_{(\text{FeCl}_3)} / \rho_{(\text{FeCl}_3)}) \times (\Delta V_{(\text{FeCl}_3)} + 1) + (m\omega_{(\text{graphite})} / \rho_{(\text{graphite})}) \times (\Delta V_{(\text{graphite})} + 1)}{m\omega_{(\text{FeCl}_3)} / \rho_{(\text{FeCl}_3)} + m\omega_{(\text{graphite})} / \rho_{(\text{graphite})}} - 100\%$$

$$\text{Therefore, } \Delta V_{(\text{FeCl}_3\text{-HOGIC})} = (0.518m/2.90 \times 1.226 + 0.482m/2.25 \times 1.105) / (0.518m/2.90 + 0.482m/2.25) - 100\% = 16.0\%$$

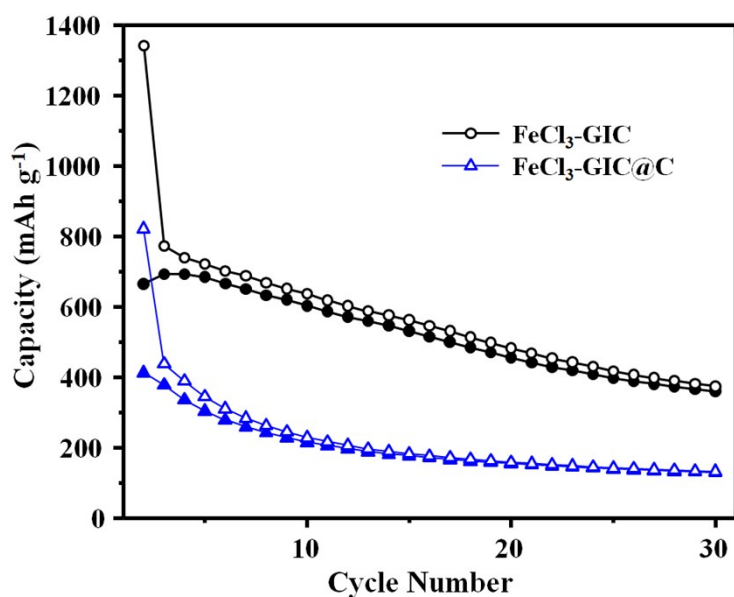

**Figure S12.** Cycle performance of FeCl<sub>3</sub>-GIC and FeCl<sub>3</sub>-GIC@C at a current density of 200 mA g<sup>-1</sup>.

### Preparation of FeCl<sub>3</sub>-GIC@C.

The carbon coating procedure of FeCl<sub>3</sub>-GIC was performed using our previously reported method.<sup>3</sup> 280 mg of FeCl<sub>3</sub>-GIC precursor was dispersed in 100 mL of Tris buffer aqueous solution (pH: ~8.5) and subsequently 100 mg of dopamine was added. The polymerization was occurred at 35 °C for 24 h under continuous stirring. Afterwards, the collected polydopamine-coated FeCl<sub>3</sub>-GIC was heated at 3 °C min<sup>-1</sup> from room temperature to 150 °C and kept at this temperature for 1 h under an argon flow. The temperature was then raised at 1 °C min<sup>-1</sup> to 450 °C and kept at this temperature for 4 h to achieve the FeCl<sub>3</sub>-GIC@C material.

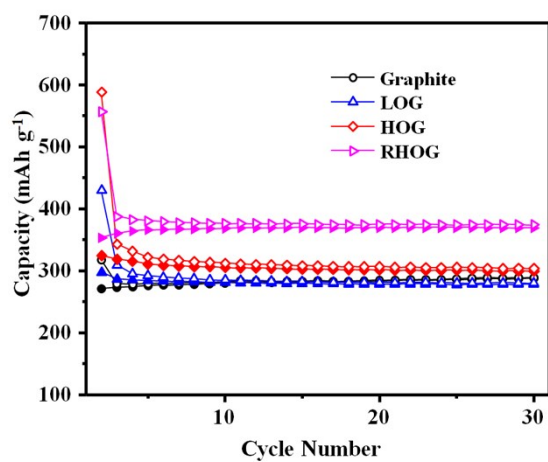

**Figure 13.** Comparison of cycle performance of pristine graphite, LOG, HOG and RHOG at a current density of  $200 \text{ mA g}^{-1}$ .

|                       | $C_6Li$                  | CLi                       |                  |
|-----------------------|--------------------------|---------------------------|------------------|
|                       | <b>a</b><br>             | <b>b</b><br>              | <b>Top view</b>  |
|                       |                          |                           | <b>Side view</b> |
| <b>Binding energy</b> | $E_{b1} = 2.32\text{eV}$ | $E_{b2} = -0.39\text{eV}$ |                  |
|                       | $CLi/FeCl_3$             | $CLi/LiCl$                |                  |
|                       | <b>c</b><br>             | <b>d</b><br>              | <b>Top view</b>  |
|                       |                          |                           | <b>Side view</b> |
| <b>Binding energy</b> | $E_{b3} = 3.74\text{eV}$ | $E_{b4} = 2.67\text{eV}$  |                  |

**Figure S14.** The structural models and simulated formation energies of (a)  $C_6Li$ , (b) CLi, (c)  $CLi/FeCl_3$  and (d)  $CLi/LiCl$  with top view and side view structures.

The formation energy per Li atom ( $E_b$ ) for the thermodynamic stability of a graphite layer with the monolayer Li to make  $C_xLi$  composite or CLi with the monolayer  $FeCl_3$  and  $LiCl$ , are defined as:

$$E_{b1} = (E_{Li} + E_G - E_{C_6Li})/n$$

$$E_{b2} = (E_{Li} + E_G - E_{CLi})/n$$

$$E_{b3} = (E_{FeCl_3} + E_{CLi} - E_{CLi/FeCl_3})/n$$

$$E_{b4} = (E_{LiCl} + E_{CLi} - E_{CLi/LiCl})/n$$

where  $E_{Li}$ ,  $E_{LiCl}$ ,  $E_G$ ,  $E_{C_6Li}$ ,  $E_{CLi}$ ,  $E_{CLi/FeCl_3}$  and  $E_{CLi/LiCl}$  represent the total relaxation

energies of monolayer Li, LiCl, G, C<sub>6</sub>Li, CLi, CLi/FeCl<sub>3</sub> and CLi/LiCl composite, respectively.  $n$  is the total number of Li atom in the supercell.

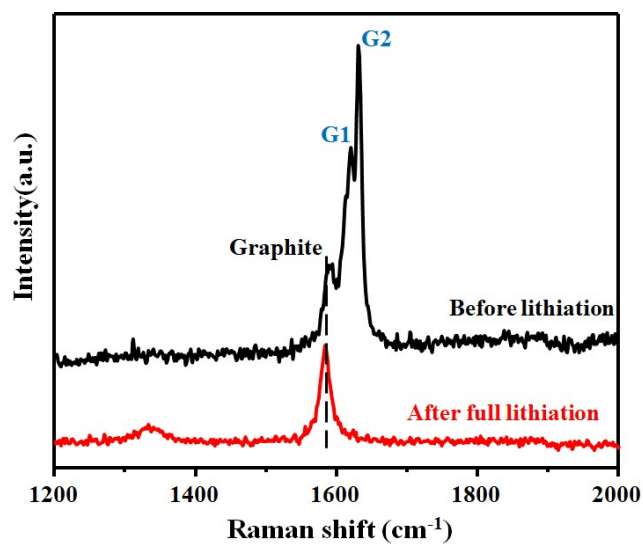

**Figure 15.** Raman spectra of FeCl<sub>3</sub>-HOGIC before lithiation and after the full lithiation to 0.005 V.

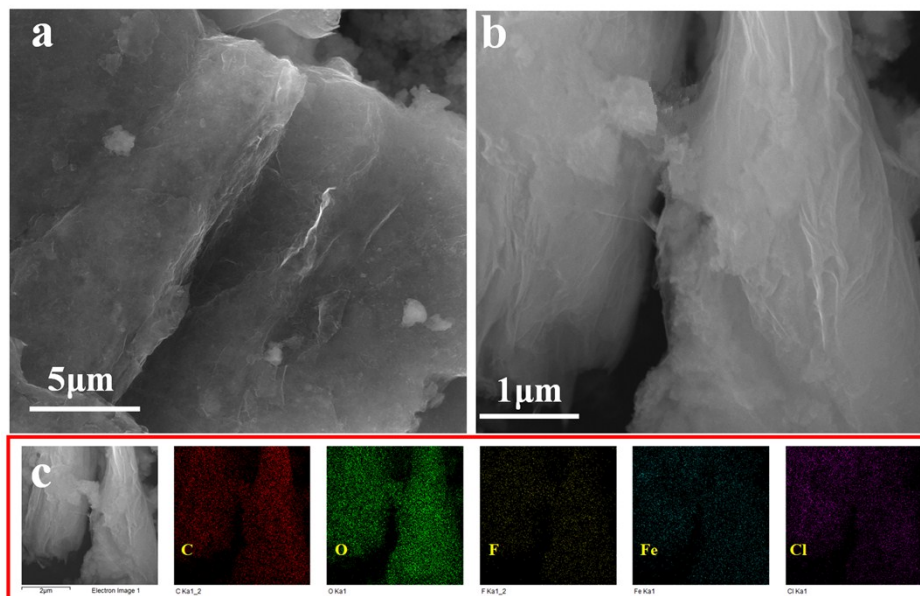

**Figure S16.** The SEM images of FeCl<sub>3</sub>-HOGIC anodes after 50 fully charge/discharge cycles and (c) the corresponding elemental mappings.

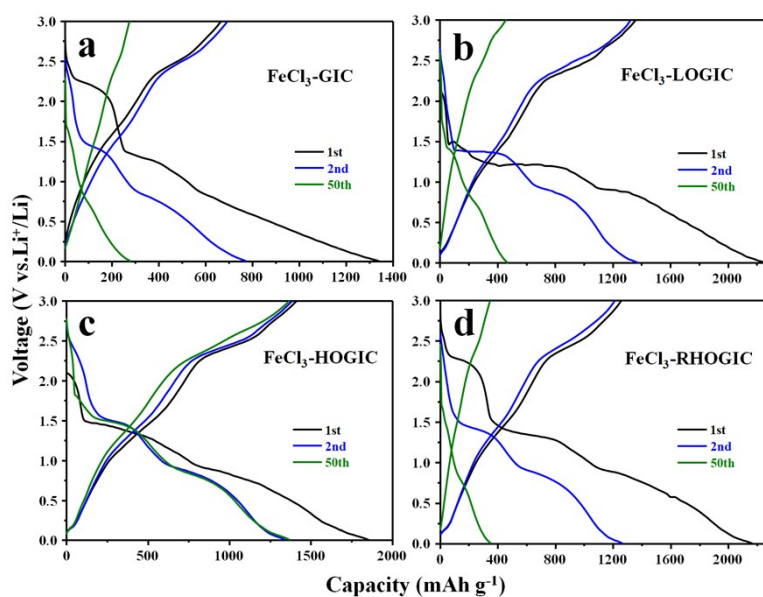

**Figure S17.** Galvanostatic discharge/charge profiles of (a) FeCl<sub>3</sub>-GIC, (b) FeCl<sub>3</sub>-LOGIC, (c) FeCl<sub>3</sub>-HOGIC and (d) FeCl<sub>3</sub>-RHOGIC at a current density of 200 mA g<sup>-1</sup> within the potential window of 3.0 to 0.005 V.



**Table S2.** Fitted electrochemical impedance parameters of the FeCl<sub>3</sub>-HOGIC anode.

| Sample           | R <sub>e</sub> /Ohm | R <sub>f</sub> /Ohm | R <sub>ct</sub> /Ohm | Z <sub>w</sub> /Ohm |
|------------------|---------------------|---------------------|----------------------|---------------------|
| fresh            | 4.28                | 113.26              | 157.54               | 41.34               |
| after 1st cycle  | 5.34                | 6.74                | 15.26                | 63.57               |
| after 50th cycle | 9.42                | 5.57                | 14.84                | 78.91               |

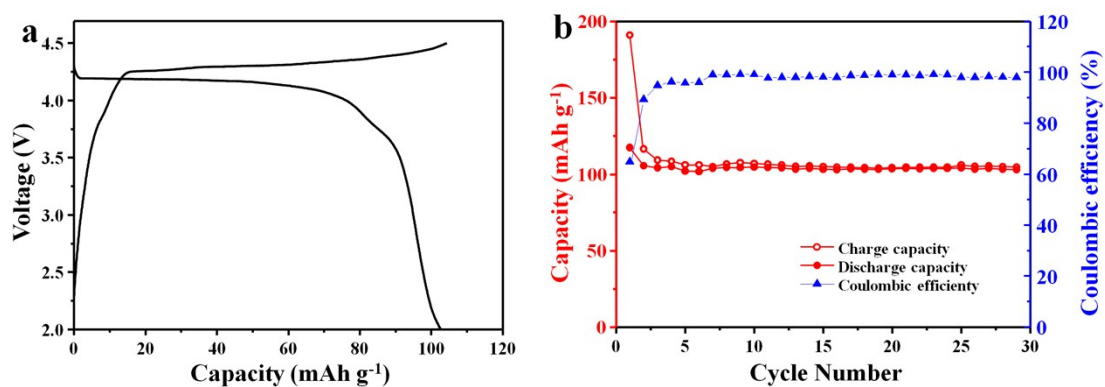

**Figure S18.** (a) Typical galvanostatic discharge/charge profiles of a full cell consisting of LiVPO<sub>4</sub>F cathode and FeCl<sub>3</sub>-HOGIC anode between 2.0 and 4.5 V and (b) its cycle performance and Coulombic efficiencies.

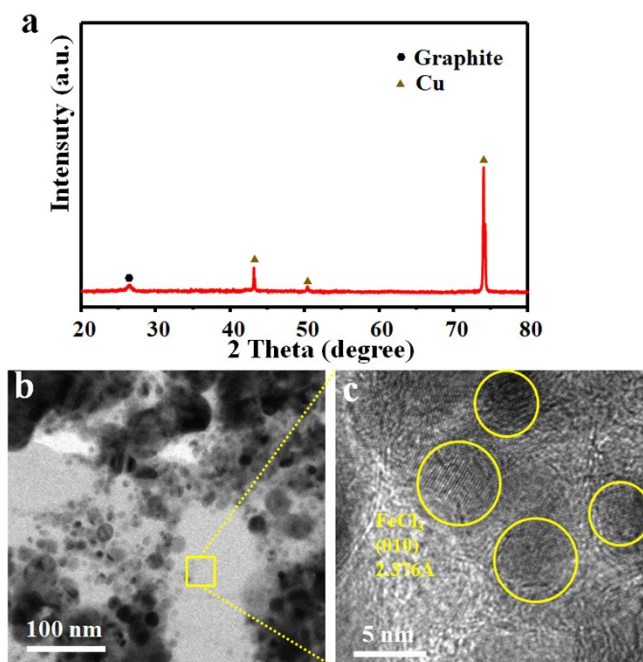

**Figure S19.** (a) XRD pattern and (b,c) TEM images of the FeCl<sub>3</sub>-HOGIC electrode after 50 cycles at a current density of 200 mA g<sup>-1</sup>.

## References

1. Z. Tian, P. Yu, S. E. Lowe, A. G. Pandolfo, T. R. Gengenbach, K. M. Nairn, J. C. Song, X. Wang, Y. L. Zhong and D. Li, *Carbon*, 2017, 112, 185-191.
2. F. Wang, J. Yi, Y. Wang, C. Wang, J. Wang and Y. Xia, *Adv. Energy Mater.*, 2014, 4, 1300600.
3. F. Han, C. Zhang, J. Yang, G. Ma, K. He and X. Li, *J. Mater. Chem. A*, 2016, 4, 12781-12789.
